# Supplementary material
Source: MDPI journal article supplement (https://www.mdpi.com/2073-4352/6/4/37)
Supplement: s1 [file s1]

## Supplementary Information

### Isomorphous crystals from diynes and bromodiyne involved in hydrogen and halogen bonds

Baillargeon, Caron-Duval, Pellerin, Gagné, Dory

#### Synthesis

|                                                                                              |   |
|----------------------------------------------------------------------------------------------|---|
| <sup>1</sup> H and <sup>13</sup> C NMR spectra of <b>1</b> , <b>2</b> and <b>5-7</b> . ..... | 2 |
|----------------------------------------------------------------------------------------------|---|

#### Crystal structures

|                                        |    |
|----------------------------------------|----|
| Report for diyne <b>1</b> . .....      | 6  |
| Report for bromodiyne <b>2</b> . ..... | 10 |

|                                                                         |    |
|-------------------------------------------------------------------------|----|
| Variations of geometry during calculations of system <b>8-8-9</b> ..... | 14 |
|-------------------------------------------------------------------------|----|

|                                                                          |    |
|--------------------------------------------------------------------------|----|
| Variations of geometry during calculations of system <b>8-8-10</b> ..... | 15 |
|--------------------------------------------------------------------------|----|

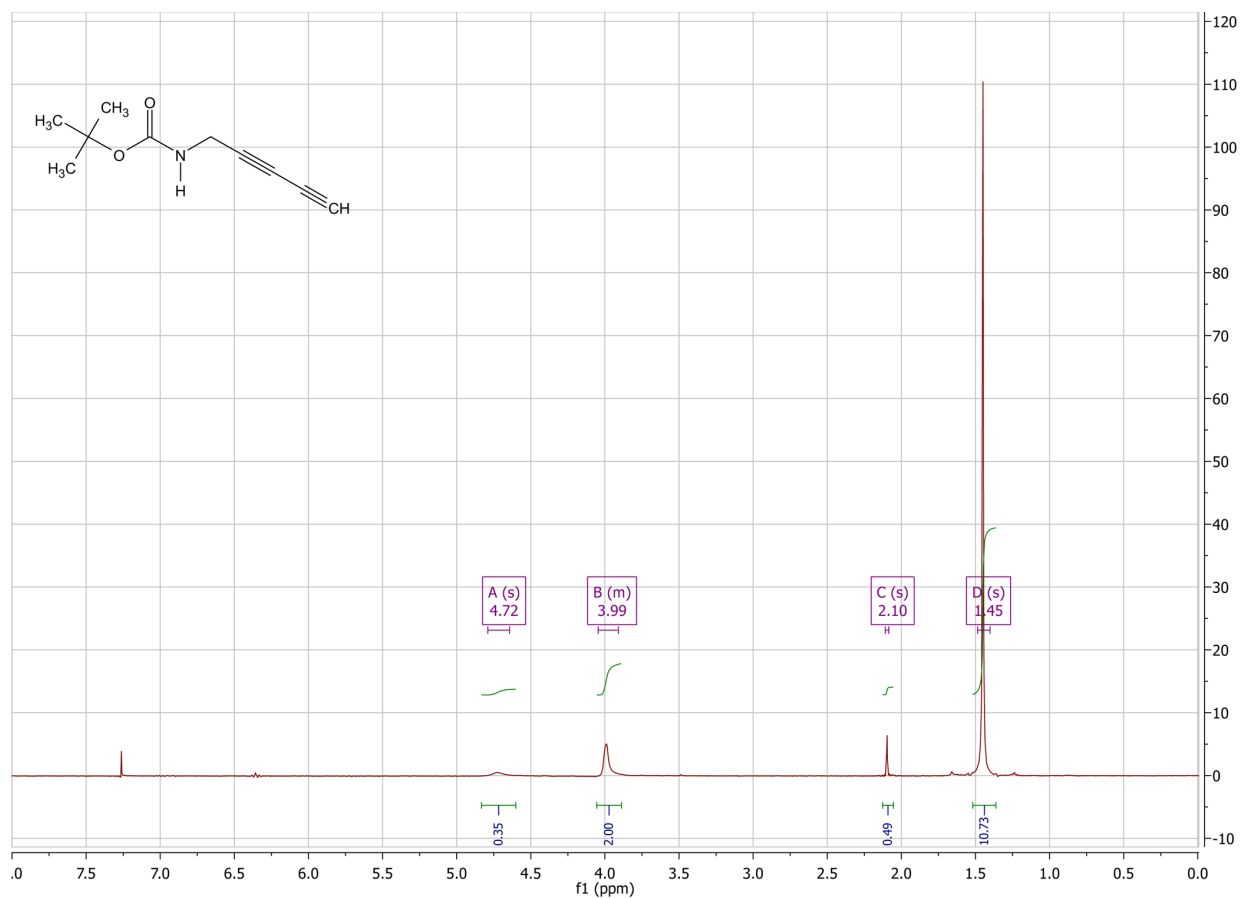

<sup>1</sup>H NMR spectrum of compound **1** in CDCl<sub>3</sub>, (400 MHz).

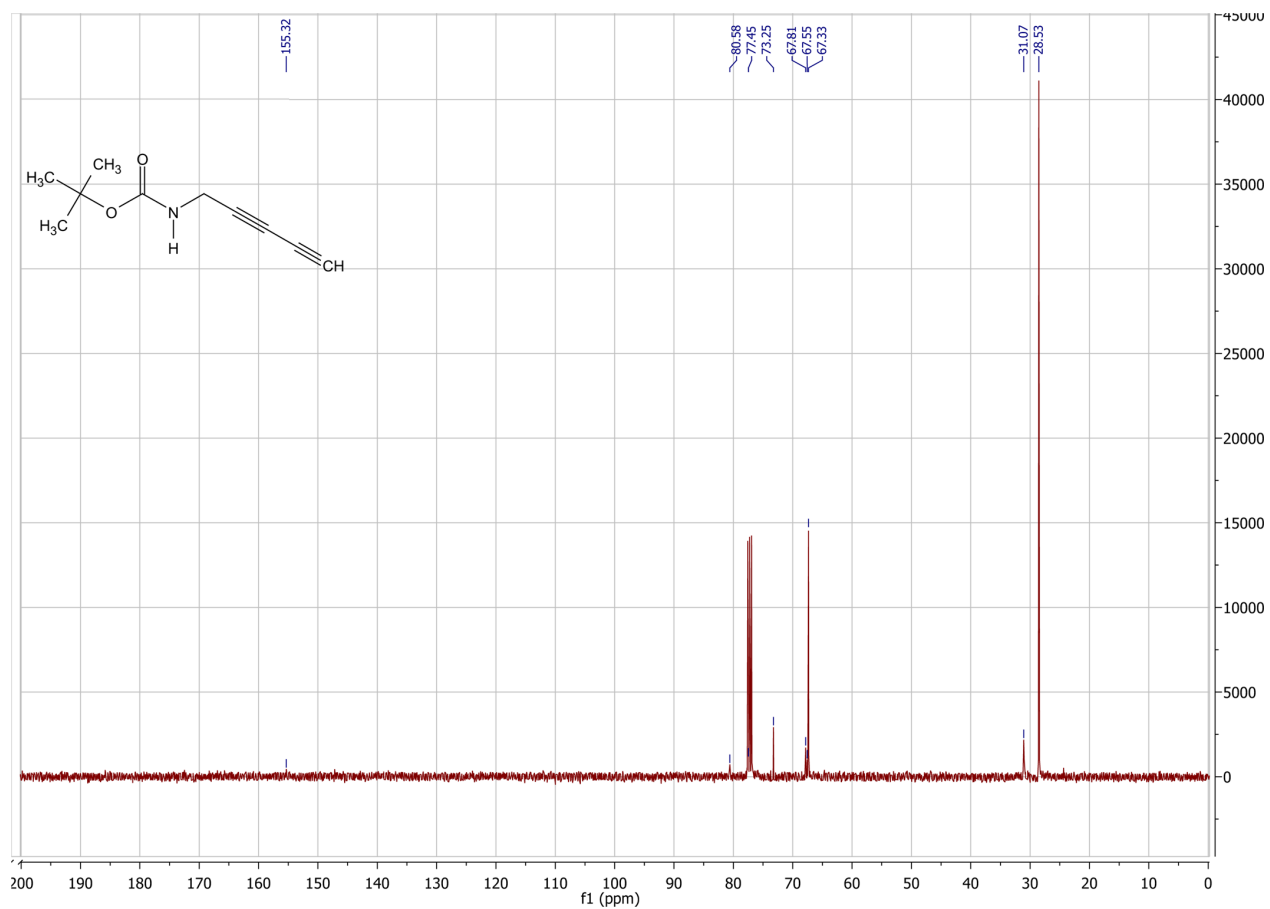

<sup>13</sup>C NMR spectrum of compound **1** in CDCl<sub>3</sub>, (100 MHz).



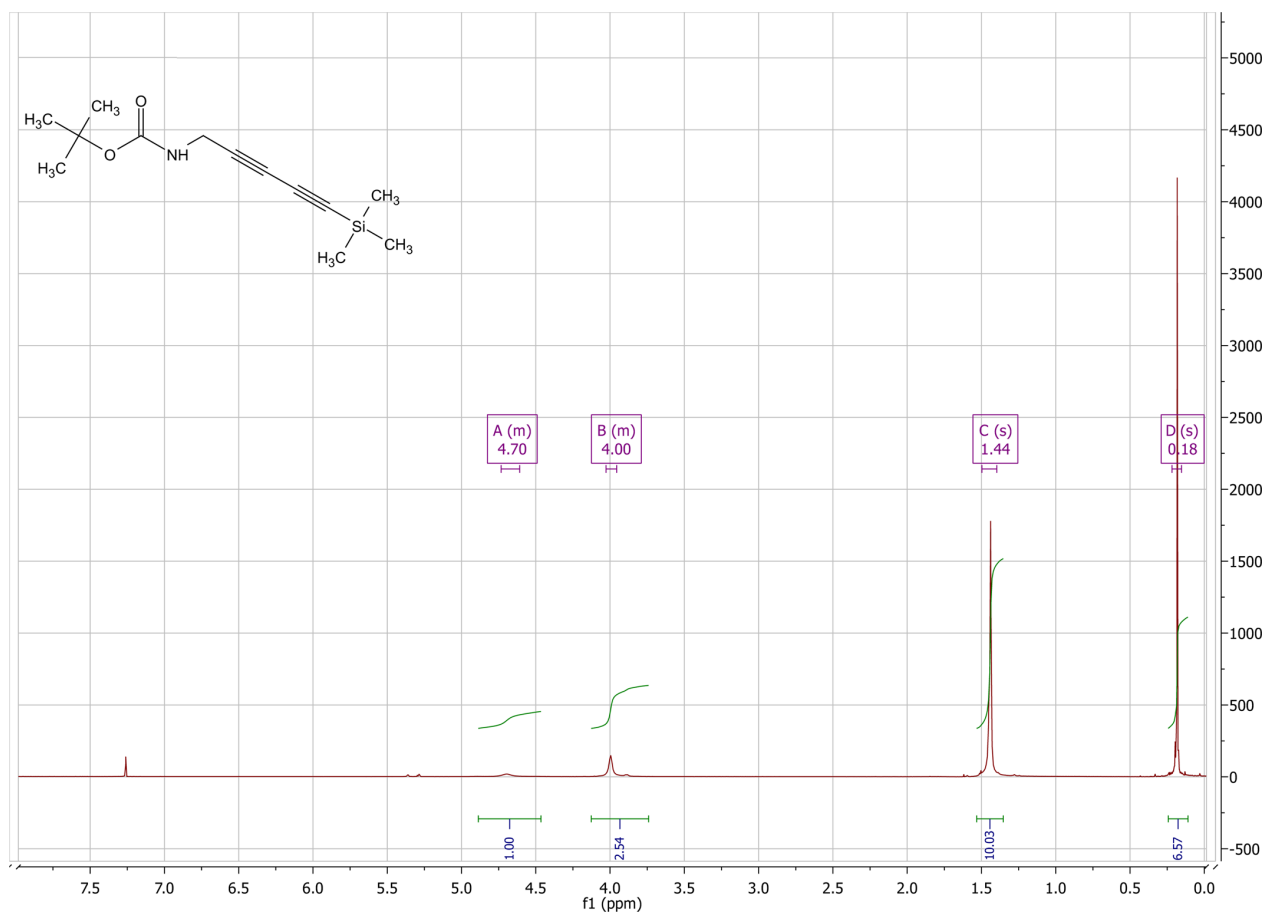

<sup>1</sup>H NMR spectrum of compound 5 in CDCl<sub>3</sub>, (400 MHz).

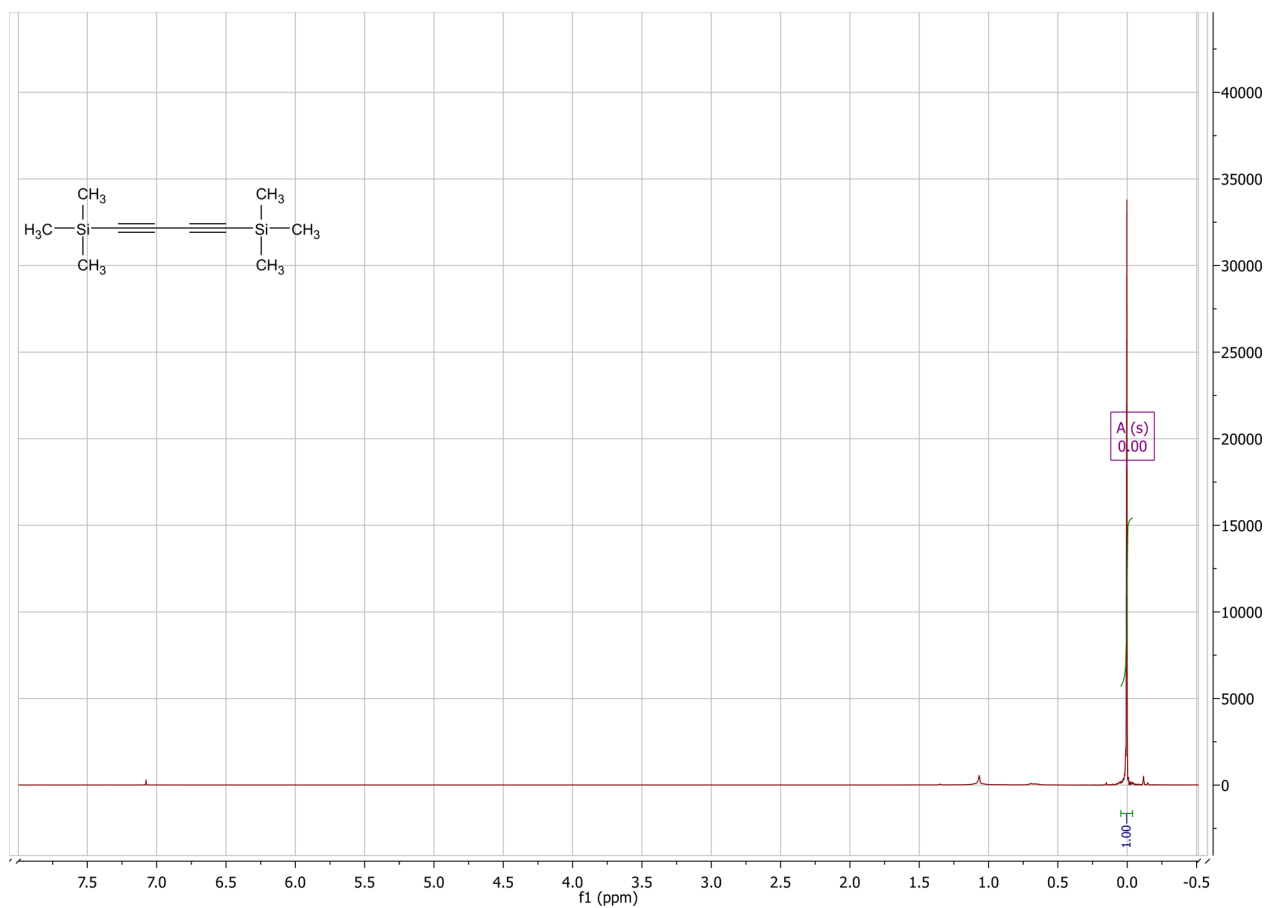

<sup>1</sup>H NMR spectrum of compound 6 in CDCl<sub>3</sub>, (400 MHz).

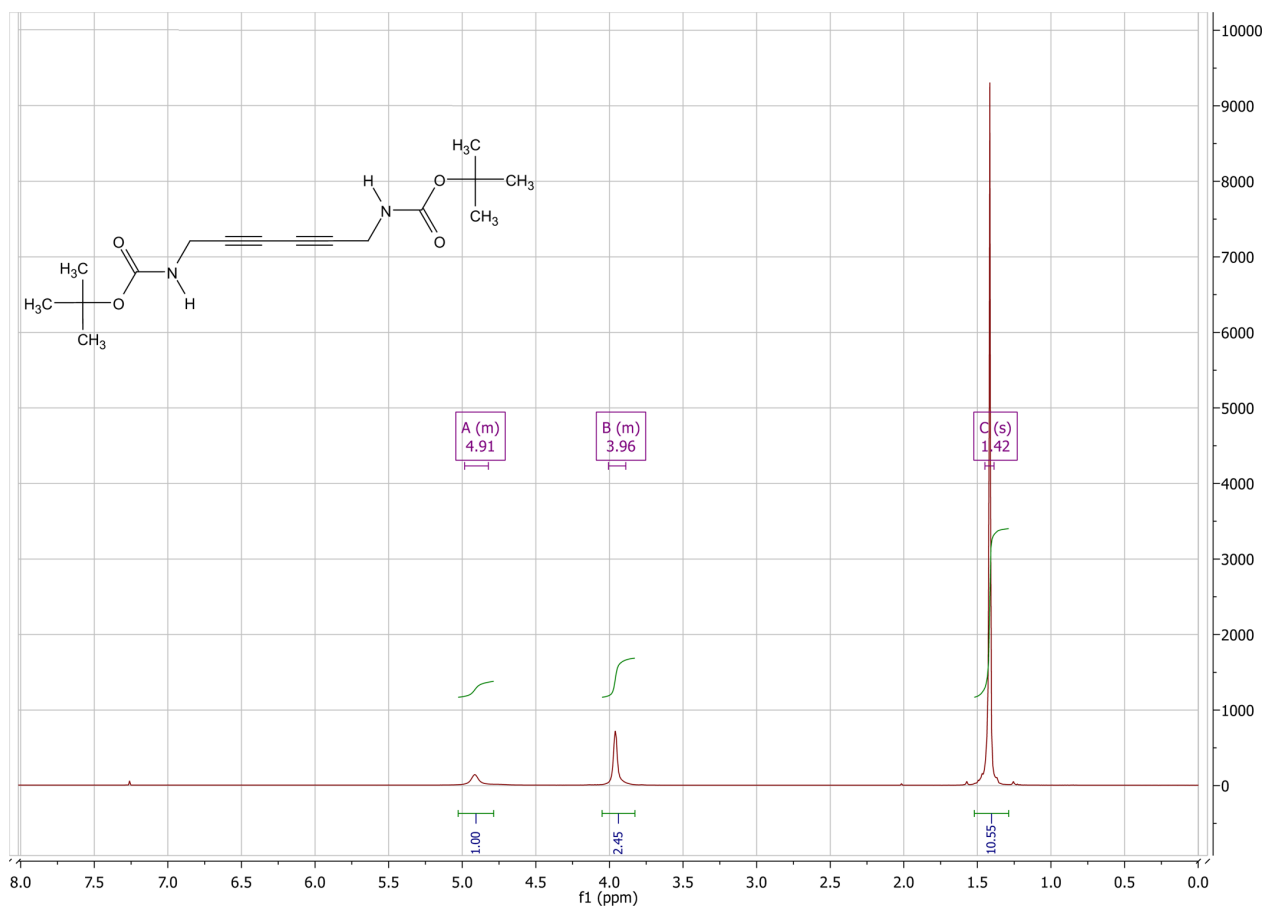

$^1\text{H}$  NMR spectrum of compound 7 in  $\text{CDCl}_3$ , (400 MHz).

# Crystal Structure Report for Dory\_PBESNHdiyne

## Compound 1

A Needle-like specimen of  $C_{10}H_{13}NO_2$ , approximate dimensions 0.050 mm x 0.100 mm x 0.280 mm, was used for the X-ray crystallographic analysis. The X-ray intensity data were measured on a Bruker Apex DUO system equipped with a Cu K $\alpha$  ImuS micro-focus source with MX optics ( $\lambda = 1.54178$  Å).

**Table 1: Data collection details for Dory\_PBESNHdiyne.**

| Axis  | dx/<br>mm | 2 $\theta$ /<br>° | $\omega$ /<br>° | $\phi$ /<br>° | $\chi$ /<br>° | Width/<br>° | Frames | Time/<br>s | Wave-<br>length/Å | Voltage/<br>kV | Current/<br>mA | Temperature/<br>K |
|-------|-----------|-------------------|-----------------|---------------|---------------|-------------|--------|------------|-------------------|----------------|----------------|-------------------|
| Phi   | 79.723    | -76.00            | 180.66          | -9.27         | -21.74        | 6.00        | 61     | 10.00      | 1.54184           | 45             | 0.7            | 173.19            |
| Phi   | 79.723    | 118.00            | 116.80          | -350.39       | 22.49         | 6.00        | 61     | 10.00      | 1.54184           | 45             | 0.7            | 173.19            |
| Phi   | 79.723    | 112.00            | 228.07          | -18.32        | -41.07        | 6.00        | 61     | 10.00      | 1.54184           | 45             | 0.7            | 173.19            |
| Phi   | 79.723    | -70.00            | 147.00          | -335.97       | 51.78         | 6.00        | 61     | 10.00      | 1.54184           | 45             | 0.7            | 173.19            |
| Phi   | 79.723    | 118.00            | 43.74           | -321.81       | 72.77         | 6.00        | 61     | 10.00      | 1.54184           | 45             | 0.7            | 173.19            |
| Phi   | 79.723    | -24.00            | 204.61          | -327.06       | 35.94         | 6.00        | 58     | 10.00      | 1.54184           | 45             | 0.7            | 173.19            |
| Phi   | 79.723    | 122.00            | 93.61           | -344.21       | 35.94         | 6.00        | 61     | 10.00      | 1.54184           | 45             | 0.7            | 173.19            |
| Phi   | 79.723    | -62.00            | 325.36          | -8.61         | -20.22        | 6.00        | 61     | 10.00      | 1.54184           | 45             | 0.7            | 173.19            |
| Phi   | 79.723    | 88.00             | 212.94          | -32.05        | -64.62        | 6.00        | 61     | 10.00      | 1.54184           | 45             | 0.7            | 173.19            |
| Phi   | 79.723    | 122.00            | 236.31          | -40.72        | -75.73        | 6.00        | 61     | 10.00      | 1.54184           | 45             | 0.7            | 173.19            |
| Phi   | 79.723    | 120.00            | 149.15          | -344.67       | 22.49         | 6.00        | 60     | 10.00      | 1.54184           | 45             | 0.7            | 173.19            |
| Phi   | 79.723    | 120.00            | 214.34          | -39.70        | -74.56        | 6.00        | 61     | 10.00      | 1.54184           | 45             | 0.7            | 173.19            |
| Phi   | 79.723    | 54.00             | 37.33           | -69.16        | -96.16        | 6.00        | 61     | 10.00      | 1.54184           | 45             | 0.7            | 173.19            |
| Phi   | 79.723    | 90.00             | 14.44           | -343.49       | 37.41         | 6.00        | 61     | 10.00      | 1.54184           | 45             | 0.7            | 173.19            |
| Omega | 79.723    | -34.00            | -207.90         | 28.98         | 88.60         | 6.00        | 13     | 10.00      | 1.54184           | 45             | 0.7            | 173.19            |
| Omega | 79.723    | 74.00             | -201.07         | -204.61       | -96.69        | 6.00        | 12     | 10.00      | 1.54184           | 45             | 0.7            | 173.19            |
| Phi   | 79.723    | 116.00            | 77.76           | -339.07       | 46.12         | 6.00        | 61     | 10.00      | 1.54184           | 45             | 0.7            | 173.19            |
| Phi   | 79.723    | 88.00             | 238.44          | 17.18         | -79.13        | 6.00        | 50     | 10.00      | 1.54184           | 45             | 0.7            | 173.19            |
| Omega | 79.723    | 108.00            | -200.59         | 38.39         | -89.04        | 6.00        | 12     | 10.00      | 1.54184           | 45             | 0.7            | 173.19            |
| Omega | 79.723    | 120.00            | -203.18         | -13.70        | -74.56        | 6.00        | 13     | 10.00      | 1.54184           | 45             | 0.7            | 173.19            |
| Omega | 79.723    | 122.00            | -200.86         | 17.69         | -95.00        | 6.00        | 13     | 10.00      | 1.54184           | 45             | 0.7            | 173.19            |
| Omega | 79.723    | 120.00            | -208.96         | 69.95         | -64.62        | 6.00        | 15     | 10.00      | 1.54184           | 45             | 0.7            | 173.19            |
| Omega | 79.723    | -52.00            | -179.66         | -58.91        | 34.46         | 6.00        | 30     | 10.00      | 1.54184           | 45             | 0.7            | 173.19            |
| Omega | 79.723    | 120.00            | 15.56           | -241.29       | -26.26        | 6.00        | 39     | 10.00      | 1.54184           | 45             | 0.7            | 173.19            |
| Omega | 79.723    | 120.00            | -10.81          | -51.72        | 19.47         | 6.00        | 40     | 10.00      | 1.54184           | 45             | 0.7            | 173.19            |
| Phi   | 79.723    | 108.00            | 57.47           | -262.97       | 81.82         | 6.00        | 52     | 10.00      | 1.54184           | 45             | 0.7            | 173.19            |
| Phi   | 79.723    | -28.00            | 160.40          | -66.31        | -95.00        | 6.00        | 61     | 10.00      | 1.54184           | 45             | 0.7            | 173.19            |
| Phi   | 79.723    | 76.00             | 100.36          | -351.06       | 20.98         | 6.00        | 61     | 10.00      | 1.54184           | 45             | 0.7            | 173.19            |
| Phi   | 79.723    | 58.00             | 27.40           | -344.91       | 34.46         | 6.00        | 61     | 10.00      | 1.54184           | 45             | 0.7            | 173.19            |
| Phi   | 79.723    | 120.00            | 175.91          | -84.18        | -99.71        | 6.00        | 61     | 10.00      | 1.54184           | 45             | 0.7            | 173.19            |
| Phi   | 79.723    | 122.00            | 3.06            | -302.47       | 90.31         | 6.00        | 61     | 10.00      | 1.54184           | 45             | 0.7            | 173.19            |
| Phi   | 79.723    | 120.00            | 36.25           | -281.19       | 98.91         | 6.00        | 61     | 10.00      | 1.54184           | 45             | 0.7            | 173.19            |
| Phi   | 79.723    | -68.00            | 177.05          | -336.76       | 50.38         | 6.00        | 61     | 10.00      | 1.54184           | 45             | 0.7            | 173.19            |
| Phi   | 79.723    | -64.00            | 12.11           | -10.61        | -24.76        | 6.00        | 61     | 10.00      | 1.54184           | 45             | 0.7            | 173.19            |
| Phi   | 79.723    | 62.00             | 191.34          | -14.03        | -32.24        | 6.00        | 61     | 10.00      | 1.54184           | 45             | 0.7            | 173.19            |
| Phi   | 79.723    | 72.00             | 24.26           | -337.54       | 48.96         | 6.00        | 61     | 10.00      | 1.54184           | 45             | 0.7            | 173.19            |
| Phi   | 79.723    | 98.00             | 194.25          | -348.37       | 27.01         | 6.00        | 61     | 10.00      | 1.54184           | 45             | 0.7            | 173.19            |

A total of 1871 frames were collected. The total exposure time was 5.20 hours. The frames were integrated with the Bruker SAINT software package using a wide-frame algorithm. The integration of the data using a monoclinic unit cell yielded a total of 5204 reflections to a maximum  $\theta$  angle of 68.50° (0.83 Å resolution), of which 1848 were independent (average redundancy 2.816, completeness = 99.0%,  $R_{int} = 4.03\%$ ,  $R_{sig} = 4.14\%$ ) and 1409 (76.24%) were greater than  $2\sigma(F^2)$ . The final cell constants of  $a = 9.3613(15)$  Å,  $b = 9.3135(14)$  Å,  $c = 11.8981(19)$  Å,  $\beta = 102.497(5)^\circ$ , volume = 1012.8(3) Å<sup>3</sup>, are based upon the refinement of the XYZ-centroids of 7474 reflections above  $20\sigma(I)$  with  $9.677^\circ < 2\theta < 136.9^\circ$ . Data were corrected for absorption effects using the multi-scan method (SADABS). The ratio of minimum to maximum apparent transmission was 0.855. The calculated minimum and maximum transmission coefficients (based on crystal size) are 0.8353 and 0.9674.

The structure was solved and refined using the Bruker SHELXTL Software Package, using the space group **P 1 21/c 1**, with **Z = 4** for the formula unit, **C<sub>10</sub>H<sub>13</sub>NO<sub>2</sub>**. The final anisotropic full-matrix least-squares refinement on **F<sup>2</sup>** with **122** variables converged at **R1 = 3.82%**, for the observed data and **wR2 = 9.15%** for all data. The goodness-of-fit was **1.027**. The largest peak in the final difference electron density synthesis was **0.170 e/Å<sup>3</sup>** and the largest hole was **-0.170 e/Å<sup>3</sup>** with an RMS deviation of **0.038 e/Å<sup>3</sup>**. On the basis of the final model, the calculated density was **1.175 g/cm<sup>3</sup>** and **F(000), 384 e<sup>-</sup>**.

**Table 2. Sample and crystal data for Dory\_PBESNHdiyne.**

|                        |                                                 |                 |
|------------------------|-------------------------------------------------|-----------------|
| Identification code    | Dory_PBESNHdiyne                                |                 |
| Chemical formula       | C <sub>10</sub> H <sub>13</sub> NO <sub>2</sub> |                 |
| Formula weight         | 179.21                                          |                 |
| Temperature            | 173(2) K                                        |                 |
| Wavelength             | 1.54178 Å                                       |                 |
| Crystal size           | 0.050 x 0.100 x 0.280 mm                        |                 |
| Crystal system         | monoclinic                                      |                 |
| Space group            | P 1 21/c 1                                      |                 |
| Unit cell dimensions   | a = 9.3613(15) Å                                | α = 90°         |
|                        | b = 9.3135(14) Å                                | β = 102.497(5)° |
|                        | c = 11.8981(19) Å                               | γ = 90°         |
| Volume                 | 1012.8(3) Å <sup>3</sup>                        |                 |
| Z                      | 4                                               |                 |
| Density (calculated)   | 1.175 g/cm <sup>3</sup>                         |                 |
| Absorption coefficient | 0.667 mm <sup>-1</sup>                          |                 |
| F(000)                 | 384                                             |                 |

**Table 3. Data collection and structure refinement for Dory\_PBESNHdiyne.**

|                                     |                                                                                                                                                                       |                           |
|-------------------------------------|-----------------------------------------------------------------------------------------------------------------------------------------------------------------------|---------------------------|
| Diffractometer                      | Bruker Apex DUO                                                                                                                                                       |                           |
| Radiation source                    | ImuS micro—focus source with MX optics, Cu Kα                                                                                                                         |                           |
| Theta range for data collection     | 4.84 to 68.50°                                                                                                                                                        |                           |
| Index ranges                        | -11 ≤ h ≤ 11, -11 ≤ k ≤ 9, -14 ≤ l ≤ 12                                                                                                                               |                           |
| Reflections collected               | 5204                                                                                                                                                                  |                           |
| Independent reflections             | 1848 [R(int) = 0.0403]                                                                                                                                                |                           |
| Coverage of independent reflections | 99.0%                                                                                                                                                                 |                           |
| Absorption correction               | multi-scan                                                                                                                                                            |                           |
| Max. and min. transmission          | 0.9674 and 0.8353                                                                                                                                                     |                           |
| Structure solution technique        | direct methods                                                                                                                                                        |                           |
| Structure solution program          | SHELXS-97 (Sheldrick, 2008)                                                                                                                                           |                           |
| Refinement method                   | Full-matrix least-squares on F <sup>2</sup>                                                                                                                           |                           |
| Refinement program                  | SHELXL-97 (Sheldrick, 2008)                                                                                                                                           |                           |
| Function minimized                  | Σ w(F <sub>o</sub> <sup>2</sup> - F <sub>c</sub> <sup>2</sup> ) <sup>2</sup>                                                                                          |                           |
| Data / restraints / parameters      | 1848 / 0 / 122                                                                                                                                                        |                           |
| Goodness-of-fit on F <sup>2</sup>   | 1.027                                                                                                                                                                 |                           |
| Δ/σ <sub>max</sub>                  | 0.010                                                                                                                                                                 |                           |
| Final R indices                     | 1409 data; I > 2σ(I)                                                                                                                                                  | R1 = 0.0382, wR2 = 0.0840 |
|                                     | all data                                                                                                                                                              | R1 = 0.0541, wR2 = 0.0915 |
|                                     | w = 1/[σ <sup>2</sup> (F <sub>o</sub> <sup>2</sup> ) + (0.0356P) <sup>2</sup> + 0.1910P]<br>where P = (F <sub>o</sub> <sup>2</sup> + 2F <sub>c</sub> <sup>2</sup> )/3 |                           |
| Weighting scheme                    |                                                                                                                                                                       |                           |
| Extinction coefficient              | 0.0050(6)                                                                                                                                                             |                           |
| Largest diff. peak and hole         | 0.170 and -0.170 eÅ <sup>-3</sup>                                                                                                                                     |                           |
| R.M.S. deviation from mean          | 0.038 eÅ <sup>-3</sup>                                                                                                                                                |                           |

**Table 4. Atomic coordinates and equivalent isotropic atomic displacement parameters ( $\text{\AA}^2$ ) for Dory\_PBESNHdiyne.**

U(eq) is defined as one third of the trace of the orthogonalized  $U_{ij}$  tensor.

|     | x/a         | y/b         | z/c         | U(eq)     |
|-----|-------------|-------------|-------------|-----------|
| C1  | 0.22271(16) | 0.87948(16) | 0.97484(12) | 0.0293(4) |
| C2  | 0.32477(17) | 0.78169(18) | 0.92805(15) | 0.0368(4) |
| C3  | 0.29990(18) | 0.01637(18) | 0.02400(15) | 0.0388(4) |
| C4  | 0.15163(19) | 0.8066(2)   | 0.06278(14) | 0.0410(4) |
| C5  | 0.01427(15) | 0.84814(15) | 0.80913(13) | 0.0261(3) |
| C6  | 0.82339(16) | 0.85516(17) | 0.63405(14) | 0.0348(4) |
| C7  | 0.67774(17) | 0.90106(17) | 0.64759(13) | 0.0325(4) |
| C8  | 0.56255(17) | 0.94867(17) | 0.65721(13) | 0.0331(4) |
| C9  | 0.43115(18) | 0.00908(18) | 0.66758(14) | 0.0363(4) |
| C10 | 0.3191(2)   | 0.0629(2)   | 0.67699(15) | 0.0463(5) |
| N1  | 0.94079(13) | 0.92093(13) | 0.71743(11) | 0.0309(3) |
| O1  | 0.10993(10) | 0.93585(10) | 0.87716(9)  | 0.0287(3) |
| O2  | 0.99585(11) | 0.72098(11) | 0.82790(9)  | 0.0348(3) |

**Table 5. Bond lengths ( $\text{\AA}$ ) for Dory\_PBESNHdiyne.**

|        |            |        |            |
|--------|------------|--------|------------|
| C1-O1  | 1.4866(17) | C1-C2  | 1.511(2)   |
| C1-C4  | 1.517(2)   | C1-C3  | 1.519(2)   |
| C2-H9  | 0.98       | C2-H10 | 0.98       |
| C2-H11 | 0.98       | C3-H1  | 0.98       |
| C3-H7  | 0.98       | C3-H8  | 0.98       |
| C4-H3  | 0.98       | C4-H12 | 0.98       |
| C4-H13 | 0.98       | C5-O2  | 1.2243(17) |
| C5-N1  | 1.3410(18) | C5-O1  | 1.3456(17) |
| C6-N1  | 1.4476(19) | C6-C7  | 1.471(2)   |
| C6-H5  | 0.99       | C6-H6  | 0.99       |
| C7-C8  | 1.194(2)   | C8-C9  | 1.382(2)   |
| C9-C10 | 1.190(2)   | C10-H2 | 0.95       |
| N1-H4  | 0.88       |        |            |

**Table 6. Bond angles ( $^\circ$ ) for Dory\_PBESNHdiyne.**

|           |            |            |            |
|-----------|------------|------------|------------|
| O1-C1-C2  | 108.88(12) | O1-C1-C4   | 110.74(12) |
| C2-C1-C4  | 113.02(13) | O1-C1-C3   | 101.70(11) |
| C2-C1-C3  | 111.22(13) | C4-C1-C3   | 110.69(13) |
| C1-C2-H9  | 109.5      | C1-C2-H10  | 109.5      |
| H9-C2-H10 | 109.5      | C1-C2-H11  | 109.5      |
| H9-C2-H11 | 109.5      | H10-C2-H11 | 109.5      |
| C1-C3-H1  | 109.5      | C1-C3-H7   | 109.5      |
| H1-C3-H7  | 109.5      | C1-C3-H8   | 109.5      |
| H1-C3-H8  | 109.5      | H7-C3-H8   | 109.5      |
| C1-C4-H3  | 109.5      | C1-C4-H12  | 109.5      |
| H3-C4-H12 | 109.5      | C1-C4-H13  | 109.5      |
| H3-C4-H13 | 109.5      | H12-C4-H13 | 109.5      |
| O2-C5-N1  | 124.74(14) | O2-C5-O1   | 125.39(13) |
| N1-C5-O1  | 109.88(12) | N1-C6-C7   | 112.72(13) |
| N1-C6-H5  | 109.0      | C7-C6-H5   | 109.0      |
| N1-C6-H6  | 109.0      | C7-C6-H6   | 109.0      |
| H5-C6-H6  | 107.8      | C8-C7-C6   | 175.07(17) |
| C7-C8-C9  | 177.76(17) | C10-C9-C8  | 179.06(19) |
| C9-C10-H2 | 180.0      | C5-N1-C6   | 121.56(13) |
| C5-N1-H4  | 119.2      | C6-N1-H4   | 119.2      |
| C5-O1-C1  | 121.57(11) |            |            |

**Table 7. Torsion angles ( $^\circ$ ) for Dory\_PBESNHdiyne.**

|              |             |             |             |
|--------------|-------------|-------------|-------------|
| N1-C6-C7-C8  | 59.5(19)    | C6-C7-C8-C9 | 0.(6)       |
| C7-C8-C9-C10 | -27.(15)    | O2-C5-N1-C6 | 4.0(2)      |
| O1-C5-N1-C6  | -175.58(12) | C7-C6-N1-C5 | 103.25(17)  |
| O2-C5-O1-C1  | 10.4(2)     | N1-C5-O1-C1 | -170.00(11) |
| C2-C1-O1-C5  | 63.05(16)   | C4-C1-O1-C5 | -61.80(17)  |
| C3-C1-O1-C5  | -179.47(12) |             |             |



**Table 8. Anisotropic atomic displacement parameters ( $\text{\AA}^2$ ) for Dory\_PBESNHdiyne.**The anisotropic atomic displacement factor exponent takes the form:  $-2\pi [h^2 a^{*2} U_{11} + \dots + 2 h k a^* b^* U_{12}]$ 

|     | $U_{11}$   | $U_{22}$   | $U_{33}$   | $U_{23}$   | $U_{13}$   | $U_{12}$   |
|-----|------------|------------|------------|------------|------------|------------|
| C1  | 0.0255(8)  | 0.0321(8)  | 0.0277(8)  | 0.0035(7)  | 0.0001(6)  | 0.0048(7)  |
| C2  | 0.0285(9)  | 0.0381(9)  | 0.0425(10) | 0.0011(8)  | 0.0046(7)  | 0.0072(7)  |
| C3  | 0.0351(9)  | 0.0384(9)  | 0.0372(9)  | -0.0033(8) | -0.0050(8) | -0.0011(7) |
| C4  | 0.0412(10) | 0.0462(10) | 0.0364(10) | 0.0056(8)  | 0.0099(8)  | 0.0049(8)  |
| C5  | 0.0212(8)  | 0.0253(8)  | 0.0319(8)  | -0.0036(6) | 0.0056(6)  | 0.0002(6)  |
| C6  | 0.0286(9)  | 0.0384(9)  | 0.0337(9)  | -0.0074(7) | -0.0012(7) | -0.0009(7) |
| C7  | 0.0314(9)  | 0.0305(8)  | 0.0316(8)  | -0.0030(7) | -0.0021(7) | -0.0041(7) |
| C8  | 0.0319(9)  | 0.0325(9)  | 0.0322(9)  | -0.0006(7) | 0.0011(7)  | -0.0041(7) |
| C9  | 0.0336(9)  | 0.0419(10) | 0.0314(9)  | -0.0008(7) | 0.0025(7)  | -0.0022(8) |
| C10 | 0.0389(10) | 0.0547(12) | 0.0456(11) | -0.0007(9) | 0.0096(8)  | 0.0034(9)  |
| N1  | 0.0279(7)  | 0.0256(7)  | 0.0350(8)  | -0.0017(6) | -0.0024(6) | -0.0031(5) |
| O1  | 0.0241(6)  | 0.0246(5)  | 0.0331(6)  | 0.0003(4)  | -0.0033(4) | 0.0007(4)  |
| O2  | 0.0341(6)  | 0.0242(6)  | 0.0446(7)  | -0.0002(5) | 0.0052(5)  | -0.0028(5) |

**Table 9. Hydrogen atomic coordinates and isotropic atomic displacement parameters ( $\text{\AA}^2$ ) for Dory\_PBESNHdiyne.**

|     | x/a     | y/b    | z/c    | U(eq) |
|-----|---------|--------|--------|-------|
| H9  | 0.4059  | 0.7528 | 0.9907 | 0.055 |
| H10 | 0.3634  | 0.8326 | 0.8690 | 0.055 |
| H11 | 0.2712  | 0.6962 | 0.8941 | 0.055 |
| H1  | 0.2300  | 1.0799 | 1.0498 | 0.058 |
| H7  | 0.3399  | 1.0649 | 0.9645 | 0.058 |
| H8  | 0.3797  | 0.9926 | 1.0894 | 0.058 |
| H3  | 0.2255  | 0.7889 | 1.1334 | 0.062 |
| H12 | 0.1088  | 0.7150 | 1.0316 | 0.062 |
| H13 | 0.0747  | 0.8686 | 1.0801 | 0.062 |
| H5  | -0.1691 | 0.7495 | 0.6422 | 0.042 |
| H6  | -0.1653 | 0.8801 | 0.5556 | 0.042 |
| H2  | -0.7705 | 1.1058 | 0.6845 | 0.056 |
| H4  | -0.0355 | 1.0108 | 0.7077 | 0.037 |

# Crystal Structure Report for Dory\_PBBocNHdiyneBr5

## Compound 2

A prism-like specimen of  $C_{10}H_{12}BrNO_2$ , approximate dimensions 0.080 mm x 0.150 mm x 0.680 mm, was used for the X-ray crystallographic analysis. The X-ray intensity data were measured on a Bruker Apex DUO system equipped with a Cu K $\alpha$  I $\mu$ S micro-focus source with MX optics ( $\lambda = 1.54178$  Å).

**Table 1: Data collection details for Dory\_PBBocNHdiyneBr5.**

| Axis  | dx/<br>mm | 2 $\theta$ /<br>° | $\omega$ /<br>° | $\phi$ /<br>° | $\chi$ /<br>° | Width/<br>° | Frames | Time/<br>s | Wave-<br>length/Å | Voltage/<br>kV | Current/<br>mA | Temperature/<br>K |
|-------|-----------|-------------------|-----------------|---------------|---------------|-------------|--------|------------|-------------------|----------------|----------------|-------------------|
| Omega | 69.759    | 90.48             | 62.15           | -152.33       | -53.42        | 4.00        | 41     | 10.00      | 1.54184           | 45             | 0.7            | 173.19            |
| Omega | 69.759    | 98.61             | 49.54           | -74.05        | -30.89        | 4.00        | 44     | 10.00      | 1.54184           | 45             | 0.7            | 173.19            |
| Omega | 69.759    | 116.36            | 211.87          | 100.46        | -80.80        | 4.00        | 8      | 10.00      | 1.54184           | 45             | 0.7            | 173.19            |
| Omega | 69.759    | 72.91             | 45.73           | -232.83       | -55.76        | 4.00        | 41     | 10.00      | 1.54184           | 45             | 0.7            | 173.19            |
| Omega | 69.759    | 88.45             | 59.84           | 23.63         | -52.86        | 4.00        | 41     | 10.00      | 1.54184           | 45             | 0.7            | 173.19            |
| Omega | 69.759    | 118.94            | 91.72           | 87.96         | -56.73        | 4.00        | 39     | 10.00      | 1.54184           | 45             | 0.7            | 173.19            |
| Omega | 69.759    | 114.72            | 87.37           | 165.09        | -55.42        | 4.00        | 41     | 10.00      | 1.54184           | 45             | 0.7            | 173.19            |
| Omega | 69.759    | 50.90             | 23.29           | -35.72        | -54.88        | 4.00        | 41     | 10.00      | 1.54184           | 45             | 0.7            | 173.19            |
| Omega | 69.759    | 53.98             | 26.10           | 59.02         | -54.33        | 4.00        | 41     | 10.00      | 1.54184           | 45             | 0.7            | 173.19            |
| Omega | 69.759    | 120.74            | 90.06           | -43.21        | -47.99        | 4.00        | 41     | 10.00      | 1.54184           | 45             | 0.7            | 173.19            |
| Omega | 69.759    | 47.91             | -2.05           | -148.20       | -30.57        | 4.00        | 44     | 10.00      | 1.54184           | 45             | 0.7            | 173.19            |
| Omega | 69.759    | 118.79            | 89.06           | -12.38        | -49.76        | 4.00        | 29     | 10.00      | 1.54184           | 45             | 0.7            | 173.19            |
| Omega | 69.759    | 119.64            | 92.10           | 31.20         | -55.03        | 4.00        | 41     | 10.00      | 1.54184           | 45             | 0.7            | 173.19            |
| Omega | 69.759    | 115.59            | 85.19           | -130.66       | -48.51        | 4.00        | 41     | 10.00      | 1.54184           | 45             | 0.7            | 173.19            |
| Omega | 69.759    | 83.55             | 56.49           | 88.94         | -57.05        | 4.00        | 23     | 10.00      | 1.54184           | 45             | 0.7            | 173.19            |
| Omega | 69.759    | 120.17            | 81.35           | -241.84       | -37.80        | 4.00        | 42     | 10.00      | 1.54184           | 45             | 0.7            | 173.19            |
| Omega | 69.759    | 82.41             | 151.71          | 34.06         | -80.70        | 4.00        | 22     | 10.00      | 1.54184           | 45             | 0.7            | 173.19            |
| Omega | 69.759    | 70.33             | 43.62           | -87.87        | -57.79        | 4.00        | 35     | 10.00      | 1.54184           | 45             | 0.7            | 173.19            |
| Omega | 69.759    | 118.92            | 191.84          | -40.54        | -70.05        | 4.00        | 15     | 10.00      | 1.54184           | 45             | 0.7            | 173.19            |
| Omega | 69.759    | 63.75             | 31.54           | -185.73       | -46.19        | 4.00        | 41     | 10.00      | 1.54184           | 45             | 0.7            | 173.19            |
| Omega | 69.759    | 118.79            | 89.06           | -94.22        | -49.76        | 4.00        | 36     | 10.00      | 1.54184           | 45             | 0.7            | 173.19            |
| Omega | 69.759    | 118.58            | 74.72           | -162.27       | -33.79        | 4.00        | 43     | 10.00      | 1.54184           | 45             | 0.7            | 173.19            |
| Omega | 69.759    | 28.69             | -3.10           | -234.56       | -39.83        | 4.00        | 40     | 10.00      | 1.54184           | 45             | 0.7            | 173.19            |
| Omega | 69.759    | 79.02             | 51.91           | -25.73        | -55.90        | 4.00        | 40     | 10.00      | 1.54184           | 45             | 0.7            | 173.19            |
| Omega | 69.759    | -39.08            | -49.28          | -146.40       | -67.15        | 4.00        | 23     | 10.00      | 1.54184           | 45             | 0.7            | 173.19            |
| Omega | 69.759    | 116.67            | 88.79           | 69.08         | -54.33        | 4.00        | 38     | 10.00      | 1.54184           | 45             | 0.7            | 173.19            |
| Omega | 69.759    | -70.67            | -96.09          | -83.17        | -61.60        | 4.00        | 42     | 10.00      | 1.54184           | 45             | 0.7            | 173.19            |
| Omega | 69.759    | 56.72             | 31.44           | -137.30       | -61.56        | 4.00        | 8      | 10.00      | 1.54184           | 45             | 0.7            | 173.19            |
| Omega | 69.759    | 112.19            | 82.28           | -171.64       | -50.33        | 4.00        | 18     | 10.00      | 1.54184           | 45             | 0.7            | 173.19            |
| Omega | 69.759    | 116.79            | 74.43           | 144.24        | -34.82        | 4.00        | 41     | 10.00      | 1.54184           | 45             | 0.7            | 173.19            |
| Omega | 69.759    | -23.94            | -58.39          | 50.82         | -42.53        | 4.00        | 38     | 10.00      | 1.54184           | 45             | 0.7            | 173.19            |
| Omega | 69.759    | 112.48            | 146.04          | -86.82        | -69.45        | 4.00        | 27     | 10.00      | 1.54184           | 45             | 0.7            | 173.19            |
| Omega | 69.759    | 87.89             | 52.88           | 94.74         | -33.15        | 4.00        | 35     | 10.00      | 1.54184           | 45             | 0.7            | 173.19            |
| Omega | 69.759    | 16.10             | 2.23            | -12.59        | -43.44        | 4.00        | 28     | 10.00      | 1.54184           | 45             | 0.7            | 173.19            |
| Omega | 69.759    | 79.47             | 52.67           | 31.78         | -56.54        | 4.00        | 30     | 10.00      | 1.54184           | 45             | 0.7            | 173.19            |
| Omega | 69.759    | -53.00            | -78.05          | 15.68         | -62.22        | 4.00        | 27     | 10.00      | 1.54184           | 45             | 0.7            | 173.19            |
| Omega | 69.759    | 113.76            | 147.56          | 57.32         | -71.11        | 4.00        | 26     | 10.00      | 1.54184           | 45             | 0.7            | 173.19            |
| Omega | 69.759    | 89.47             | 62.30           | -189.62       | -56.82        | 4.00        | 40     | 10.00      | 1.54184           | 45             | 0.7            | 173.19            |
| Omega | 69.759    | 104.30            | 75.65           | -54.60        | -52.79        | 4.00        | 8      | 10.00      | 1.54184           | 45             | 0.7            | 173.19            |
| Omega | 69.759    | 115.94            | 65.69           | 19.97         | -30.36        | 4.00        | 44     | 10.00      | 1.54184           | 45             | 0.7            | 173.19            |
| Omega | 69.759    | 117.78            | 76.21           | -90.70        | -35.70        | 4.00        | 39     | 10.00      | 1.54184           | 45             | 0.7            | 173.19            |
| Omega | 69.759    | 85.45             | 123.23          | -118.76       | -32.02        | 4.00        | 8      | 10.00      | 1.54184           | 45             | 0.7            | 173.19            |
| Omega | 69.759    | 61.88             | 27.05           | -13.14        | -33.32        | 4.00        | 40     | 10.00      | 1.54184           | 45             | 0.7            | 173.19            |
| Omega | 69.759    | 118.52            | 90.15           | -232.50       | -53.36        | 4.00        | 8      | 10.00      | 1.54184           | 45             | 0.7            | 173.19            |
| Omega | 69.759    | 96.76             | 69.44           | -134.01       | -55.48        | 4.00        | 8      | 10.00      | 1.54184           | 45             | 0.7            | 173.19            |
| Omega | 69.759    | 117.66            | 149.05          | 168.03        | -73.70        | 4.00        | 25     | 10.00      | 1.54184           | 45             | 0.7            | 173.19            |
| Omega | 69.759    | 86.41             | 56.10           | -93.56        | -48.66        | 4.00        | 41     | 10.00      | 1.54184           | 45             | 0.7            | 173.19            |
| Omega | 69.759    | 80.62             | 52.51           | -49.78        | -53.87        | 4.00        | 40     | 10.00      | 1.54184           | 45             | 0.7            | 173.19            |
| Omega | 69.759    | 82.55             | 205.97          | -178.16       | -77.18        | 4.00        | 8      | 10.00      | 1.54184           | 45             | 0.7            | 173.19            |
| Omega | 69.759    | 118.89            | 89.81           | -136.53       | -51.94        | 4.00        | 41     | 10.00      | 1.54184           | 45             | 0.7            | 173.19            |
| Omega | 69.759    | 93.61             | 46.20           | 47.88         | -31.86        | 4.00        | 43     | 10.00      | 1.54184           | 45             | 0.7            | 173.19            |

|       |        |        |        |         |        |      |    |       |         |    |     |        |
|-------|--------|--------|--------|---------|--------|------|----|-------|---------|----|-----|--------|
| Omega | 69.759 | 118.37 | 76.83  | 85.40   | -35.72 | 4.00 | 42 | 10.00 | 1.54184 | 45 | 0.7 | 173.19 |
| Omega | 69.759 | 116.82 | 150.43 | -61.06  | -32.31 | 4.00 | 11 | 10.00 | 1.54184 | 45 | 0.7 | 173.19 |
| Omega | 69.759 | 26.97  | 12.04  | -112.94 | -64.33 | 4.00 | 8  | 10.00 | 1.54184 | 45 | 0.7 | 173.19 |
| Omega | 69.759 | 115.54 | 129.35 | -116.66 | -30.02 | 4.00 | 9  | 10.00 | 1.54184 | 45 | 0.7 | 173.19 |
| Omega | 69.759 | 118.93 | 86.92  | 138.57  | -46.51 | 4.00 | 41 | 10.00 | 1.54184 | 45 | 0.7 | 173.19 |
| Omega | 69.759 | 104.01 | 66.13  | -7.93   | -39.03 | 4.00 | 42 | 10.00 | 1.54184 | 45 | 0.7 | 173.19 |
| Omega | 69.759 | 118.84 | 154.66 | 165.99  | -63.44 | 4.00 | 27 | 10.00 | 1.54184 | 45 | 0.7 | 173.19 |
| Omega | 69.759 | 89.47  | 38.26  | -167.24 | -30.00 | 4.00 | 44 | 10.00 | 1.54184 | 45 | 0.7 | 173.19 |
| Omega | 69.759 | 118.94 | 74.48  | 1.70    | -33.68 | 4.00 | 34 | 10.00 | 1.54184 | 45 | 0.7 | 173.19 |
| Omega | 69.759 | 118.85 | 175.31 | -143.28 | -43.97 | 4.00 | 9  | 10.00 | 1.54184 | 45 | 0.7 | 173.19 |
| Omega | 69.759 | 28.58  | 27.97  | 80.28   | -41.52 | 4.00 | 32 | 10.00 | 1.54184 | 45 | 0.7 | 173.19 |
| Omega | 69.759 | 53.02  | 175.99 | 71.68   | -78.38 | 4.00 | 8  | 10.00 | 1.54184 | 45 | 0.7 | 173.19 |
| Omega | 69.759 | 115.77 | 154.68 | 64.60   | -32.59 | 4.00 | 8  | 10.00 | 1.54184 | 45 | 0.7 | 173.19 |
| Omega | 69.759 | 103.29 | 66.45  | -202.97 | -39.76 | 4.00 | 42 | 10.00 | 1.54184 | 45 | 0.7 | 173.19 |
| Omega | 69.759 | -56.88 | -89.91 | 104.35  | -34.64 | 4.00 | 20 | 10.00 | 1.54184 | 45 | 0.7 | 173.19 |
| Omega | 69.759 | -47.66 | -87.85 | -78.88  | -32.97 | 4.00 | 18 | 10.00 | 1.54184 | 45 | 0.7 | 173.19 |
| Omega | 69.759 | 116.84 | 71.45  | -33.20  | -30.25 | 4.00 | 43 | 10.00 | 1.54184 | 45 | 0.7 | 173.19 |

A total of 2082 frames were collected. The total exposure time was 5.78 hours. The frames were integrated with the Bruker SAINT software package using a wide-frame algorithm. The integration of the data using a **monoclinic** unit cell yielded a total of **16523** reflections to a maximum  $\theta$  angle of **71.79°** (**0.81 Å** resolution), of which **2175** were independent (average redundancy **7.597**, completeness = **96.2%**,  $R_{\text{int}}$  = **6.56%**,  $R_{\text{sig}}$  = **4.11%**) and **2066** (**94.99%**) were greater than  $2\sigma(F^2)$ . The final cell constants of  $a = 10.4435(16)$  Å,  $b = 9.2090(15)$  Å,  $c = 12.2744(19)$  Å,  $\beta = 102.599(4)^\circ$ , volume = **1152.1(3) Å<sup>3</sup>**, are based upon the refinement of the XYZ-centroids of **9825** reflections above  $20\sigma(I)$  with  $7.379^\circ < 2\theta < 143.5^\circ$ . Data were corrected for absorption effects using the multi-scan method (SADABS). The ratio of minimum to maximum apparent transmission was **0.438**. The calculated minimum and maximum transmission coefficients (based on crystal size) are **0.1429** and **0.7057**.

The structure was solved and refined using the Bruker SHELXTL Software Package, using the space group **P 1 21/c 1**, with  $Z = 4$  for the formula unit, **C<sub>10</sub>H<sub>12</sub>BrNO<sub>2</sub>**. The final anisotropic full-matrix least-squares refinement on  $F^2$  with **130** variables converged at  $R1 = 6.44\%$ , for the observed data and  $wR2 = 16.79\%$  for all data. The goodness-of-fit was **1.133**. The largest peak in the final difference electron density synthesis was **1.034 e/Å<sup>3</sup>** and the largest hole was **-1.362 e/Å<sup>3</sup>** with an RMS deviation of **0.156 e/Å<sup>3</sup>**. On the basis of the final model, the calculated density was **1.488 g/cm<sup>3</sup>** and  $F(000)$ , **520 e<sup>-</sup>**.

**Table 2. Sample and crystal data for Dory\_PBBocNHdiyneBr5.**

|                        |                                                   |                 |  |
|------------------------|---------------------------------------------------|-----------------|--|
| Identification code    | Dory_PBBocNHdiyneBr5                              |                 |  |
| Chemical formula       | C <sub>10</sub> H <sub>12</sub> BrNO <sub>2</sub> |                 |  |
| Formula weight         | 258.12                                            |                 |  |
| Temperature            | 173(2) K                                          |                 |  |
| Wavelength             | 1.54178 Å                                         |                 |  |
| Crystal size           | 0.080 x 0.150 x 0.680 mm                          |                 |  |
| Crystal system         | monoclinic                                        |                 |  |
| Space group            | P 1 21/c 1                                        |                 |  |
| Unit cell dimensions   | a = 10.4435(16) Å                                 | α = 90°         |  |
|                        | b = 9.2090(15) Å                                  | β = 102.599(4)° |  |
|                        | c = 12.2744(19) Å                                 | γ = 90°         |  |
| Volume                 | 1152.1(3) Å <sup>3</sup>                          |                 |  |
| Z                      | 4                                                 |                 |  |
| Density (calculated)   | 1.488 g/cm <sup>3</sup>                           |                 |  |
| Absorption coefficient | 4.683 mm <sup>-1</sup>                            |                 |  |
| F(000)                 | 520                                               |                 |  |

**Table 3. Data collection and structure refinement for Dory\_PBBocNHdiyneBr5.**

|                                     |                                                                                                                                                               |                           |
|-------------------------------------|---------------------------------------------------------------------------------------------------------------------------------------------------------------|---------------------------|
| Diffractionmeter                    | Bruker Apex DUO                                                                                                                                               |                           |
| Radiation source                    | ImuS micro—focus source with MX optics, Cu Kα                                                                                                                 |                           |
| Theta range for data collection     | 4.34 to 71.79°                                                                                                                                                |                           |
| Index ranges                        | -12<=h<=12, -11<=k<=10, -15<=l<=15                                                                                                                            |                           |
| Reflections collected               | 16523                                                                                                                                                         |                           |
| Independent reflections             | 2175 [R(int) = 0.0656]                                                                                                                                        |                           |
| Coverage of independent reflections | 96.2%                                                                                                                                                         |                           |
| Absorption correction               | multi-scan                                                                                                                                                    |                           |
| Max. and min. transmission          | 0.7057 and 0.1429                                                                                                                                             |                           |
| Structure solution technique        | direct methods                                                                                                                                                |                           |
| Structure solution program          | SHELXS-97 (Sheldrick, 2008)                                                                                                                                   |                           |
| Refinement method                   | Full-matrix least-squares on F <sup>2</sup>                                                                                                                   |                           |
| Refinement program                  | SHELXL-97 (Sheldrick, 2008)                                                                                                                                   |                           |
| Function minimized                  | Σ w(F <sub>o</sub> <sup>2</sup> - F <sub>c</sub> <sup>2</sup> ) <sup>2</sup>                                                                                  |                           |
| Data / restraints / parameters      | 2175 / 0 / 130                                                                                                                                                |                           |
| Goodness-of-fit on F <sup>2</sup>   | 1.133                                                                                                                                                         |                           |
| Final R indices                     | 2066 data; I>2σ(I)                                                                                                                                            | R1 = 0.0644, wR2 = 0.1662 |
|                                     | all data                                                                                                                                                      | R1 = 0.0659, wR2 = 0.1679 |
| Weighting scheme                    | w=1/[σ <sup>2</sup> (F <sub>o</sub> <sup>2</sup> )+(0.0869P) <sup>2</sup> +2.9103P]<br>where P=(F <sub>o</sub> <sup>2</sup> +2F <sub>c</sub> <sup>2</sup> )/3 |                           |
| Largest diff. peak and hole         | 1.034 and -1.362 eÅ <sup>-3</sup>                                                                                                                             |                           |
| R.M.S. deviation from mean          | 0.156 eÅ <sup>-3</sup>                                                                                                                                        |                           |

**Table 4. Atomic coordinates and equivalent isotropic atomic displacement parameters (Å<sup>2</sup>) for Dory\_PBBocNHdiyneBr5.**

U(eq) is defined as one third of the trace of the orthogonalized U<sub>ij</sub> tensor.

|     | x/a        | y/b        | z/c        | U(eq)      |
|-----|------------|------------|------------|------------|
| Br1 | 0.74220(5) | 0.08875(5) | 0.15967(4) | 0.0447(3)  |
| O1  | 0.6182(3)  | 0.9374(3)  | 0.3882(3)  | 0.0371(7)  |
| N1  | 0.4688(4)  | 0.9112(4)  | 0.2336(4)  | 0.0405(9)  |
| O2  | 0.5299(3)  | 0.7132(3)  | 0.3421(3)  | 0.0418(8)  |
| C1  | 0.8183(5)  | 0.7927(6)  | 0.4350(5)  | 0.0538(13) |
| C2  | 0.7257(5)  | 0.8888(5)  | 0.4810(4)  | 0.0389(10) |
| C3  | 0.5388(4)  | 0.8424(4)  | 0.3233(4)  | 0.0332(9)  |
| C4  | 0.3736(5)  | 0.8374(5)  | 0.1479(4)  | 0.0424(10) |
| C5  | 0.2380(5)  | 0.8816(6)  | 0.1490(4)  | 0.0419(11) |
| C6  | 0.1317(5)  | 0.9225(5)  | 0.1515(4)  | 0.0451(12) |
| C7  | 0.0094(5)  | 0.9739(5)  | 0.1550(4)  | 0.0412(10) |
| C8  | 0.9029(5)  | 0.0197(5)  | 0.1577(4)  | 0.0440(11) |
| C9  | 0.6688(6)  | 0.8141(6)  | 0.5709(4)  | 0.0541(13) |
| C10 | 0.7894(6)  | 0.0324(6)  | 0.5247(5)  | 0.0586(15) |

**Table 5. Bond lengths (Å) for Dory\_PBBocNHdiyneBr5.**

|          |          |          |          |
|----------|----------|----------|----------|
| Br1-C8   | 1.800(5) | O1-C3    | 1.341(5) |
| O1-C2    | 1.483(5) | N1-C3    | 1.340(6) |
| N1-C4    | 1.449(6) | N1-H1    | 0.88     |
| O2-C3    | 1.220(5) | C1-C2    | 1.508(7) |
| C1-H1A   | 0.98     | C1-H1B   | 0.98     |
| C1-H1C   | 0.98     | C2-C10   | 1.525(6) |
| C2-C9    | 1.527(7) | C4-C5    | 1.476(7) |
| C4-H4A   | 0.99     | C4-H4B   | 0.99     |
| C5-C6    | 1.179(8) | C6-C7    | 1.372(7) |
| C7-C8    | 1.196(7) | C9-H9A   | 0.98     |
| C9-H9B   | 0.98     | C9-H9C   | 0.98     |
| C10-H10A | 0.98     | C10-H10B | 0.98     |
| C10-H10C | 0.98     |          |          |

**Table 6. Bond angles (°) for Dory\_PBBocNHdiyneBr5.**

|               |          |               |          |
|---------------|----------|---------------|----------|
| C3-O1-C2      | 121.7(3) | C3-N1-C4      | 122.6(4) |
| C3-N1-H1      | 118.7    | C4-N1-H1      | 118.7    |
| C2-C1-H1A     | 109.5    | C2-C1-H1B     | 109.5    |
| H1A-C1-H1B    | 109.5    | C2-C1-H1C     | 109.5    |
| H1A-C1-H1C    | 109.5    | H1B-C1-H1C    | 109.5    |
| O1-C2-C1      | 109.2(4) | O1-C2-C10     | 102.0(3) |
| C1-C2-C10     | 112.0(5) | O1-C2-C9      | 110.0(4) |
| C1-C2-C9      | 112.9(4) | C10-C2-C9     | 110.2(5) |
| O2-C3-N1      | 124.5(4) | O2-C3-O1      | 125.9(4) |
| N1-C3-O1      | 109.6(4) | N1-C4-C5      | 111.9(4) |
| N1-C4-H4A     | 109.2    | C5-C4-H4A     | 109.2    |
| N1-C4-H4B     | 109.2    | C5-C4-H4B     | 109.2    |
| H4A-C4-H4B    | 107.9    | C6-C5-C4      | 177.2(5) |
| C5-C6-C7      | 178.4(5) | C8-C7-C6      | 179.5(6) |
| C7-C8-Br1     | 179.2(5) | C2-C9-H9A     | 109.5    |
| C2-C9-H9B     | 109.5    | H9A-C9-H9B    | 109.5    |
| C2-C9-H9C     | 109.5    | H9A-C9-H9C    | 109.5    |
| H9B-C9-H9C    | 109.5    | C2-C10-H10A   | 109.5    |
| C2-C10-H10B   | 109.5    | H10A-C10-H10B | 109.5    |
| C2-C10-H10C   | 109.5    | H10A-C10-H10C | 109.5    |
| H10B-C10-H10C | 109.5    |               |          |

**Table 7. Torsion angles (°) for Dory\_PBBocNHdiyneBr5.**

|             |           |              |          |
|-------------|-----------|--------------|----------|
| C3-O1-C2-C1 | 59.0(5)   | C3-O1-C2-C10 | 177.6(4) |
| C3-O1-C2-C9 | -65.5(5)  | C4-N1-C3-O2  | -0.1(7)  |
| C4-N1-C3-O1 | -179.7(4) | C2-O1-C3-O2  | 12.7(7)  |
| C2-O1-C3-N1 | -167.6(4) | C3-N1-C4-C5  | 110.6(5) |
| N1-C4-C5-C6 | 30.(11)   | C4-C5-C6-C7  | 10.(30)  |
| C5-C6-C7-C8 | 30.(90)   | C6-C7-C8-Br1 | 60.(100) |

**Table 8. Anisotropic atomic displacement parameters (Å<sup>2</sup>) for Dory\_PBBocNHdiyneBr5.**

The anisotropic atomic displacement factor exponent takes the form:  $-2\pi [h^2 a^{*2} U_{11} + \dots + 2 h k a^* b^* U_{12}]$

|     | U <sub>11</sub> | U <sub>22</sub> | U <sub>33</sub> | U <sub>23</sub> | U <sub>13</sub> | U <sub>12</sub> |
|-----|-----------------|-----------------|-----------------|-----------------|-----------------|-----------------|
| Br1 | 0.0452(4)       | 0.0366(4)       | 0.0529(4)       | 0.00006(19)     | 0.0122(2)       | 0.00353(19)     |
| O1  | 0.0395(16)      | 0.0215(14)      | 0.0457(17)      | -0.0028(12)     | -0.0005(13)     | -0.0017(12)     |
| N1  | 0.041(2)        | 0.027(2)        | 0.049(2)        | 0.0030(15)      | 0.0005(17)      | -0.0014(15)     |
| O2  | 0.0488(18)      | 0.0183(15)      | 0.0545(19)      | 0.0007(13)      | 0.0028(15)      | -0.0040(12)     |
| C1  | 0.045(3)        | 0.044(3)        | 0.070(3)        | 0.000(3)        | 0.006(2)        | 0.010(2)        |
| C2  | 0.042(2)        | 0.021(2)        | 0.048(2)        | 0.0005(18)      | -0.002(2)       | 0.0005(17)      |
| C3  | 0.031(2)        | 0.022(2)        | 0.048(2)        | -0.0020(17)     | 0.0115(17)      | -0.0002(16)     |
| C4  | 0.043(2)        | 0.034(3)        | 0.047(2)        | -0.0004(19)     | 0.0023(19)      | 0.0003(19)      |
| C5  | 0.044(3)        | 0.029(2)        | 0.051(3)        | 0.0038(19)      | 0.006(2)        | 0.0003(18)      |
| C6  | 0.051(3)        | 0.030(3)        | 0.048(3)        | 0.0015(19)      | -0.001(2)       | -0.004(2)       |
| C7  | 0.037(2)        | 0.038(3)        | 0.046(2)        | 0.003(2)        | 0.0028(18)      | 0.0021(19)      |
| C8  | 0.049(3)        | 0.035(3)        | 0.046(2)        | 0.004(2)        | 0.006(2)        | -0.004(2)       |
| C9  | 0.072(4)        | 0.041(3)        | 0.049(3)        | 0.005(2)        | 0.015(3)        | -0.002(3)       |
| C10 | 0.060(3)        | 0.034(3)        | 0.067(3)        | -0.002(2)       | -0.016(3)       | -0.007(2)       |

**Table 9. Hydrogen atomic coordinates and isotropic atomic displacement parameters (Å<sup>2</sup>) for Dory\_PBBocNHdiyneBr5.**

|      | x/a    | y/b    | z/c    | U(eq) |
|------|--------|--------|--------|-------|
| H1   | 0.4812 | 1.0049 | 0.2265 | 0.049 |
| H1A  | 0.7728 | 0.7033 | 0.4054 | 0.081 |
| H1B  | 0.8942 | 0.7686 | 0.4946 | 0.081 |
| H1C  | 0.8480 | 0.8439 | 0.3750 | 0.081 |
| H4A  | 0.3824 | 0.7312 | 0.1598 | 0.051 |
| H4B  | 0.3920 | 0.8596 | 0.0739 | 0.051 |
| H9A  | 0.6022 | 0.8768 | 0.5918 | 0.081 |
| H9B  | 0.7392 | 0.7959 | 0.6367 | 0.081 |
| H9C  | 0.6287 | 0.7217 | 0.5421 | 0.081 |
| H10A | 0.8190 | 1.0831 | 0.4644 | 0.088 |
| H10B | 0.8647 | 1.0136 | 0.5862 | 0.088 |
| H10C | 0.7254 | 1.0928 | 0.5515 | 0.088 |

# Variations of geometry during calculations of system 8-8-9

## Cartesian coordinates and RMSD values (heavy atoms)

| atom       | input (from crystal) |        |        | DFT/B3LYP |         |         |            | DFT/M06-2X |         |         |            |
|------------|----------------------|--------|--------|-----------|---------|---------|------------|------------|---------|---------|------------|
|            | x                    | y      | z      | x         | y       | z       | distance Å | x          | y       | z       | distance Å |
| C          | -4.255               | 2.128  | -2.612 | -4.1069   | 2.1968  | -2.6259 | 0.1639     | -4.0316    | 2.3873  | -2.5687 | 0.3450     |
| O          | -3.451               | 2.653  | -1.477 | -3.5333   | 2.7294  | -1.4184 | 0.1266     | -3.3506    | 2.8286  | -1.3930 | 0.2190     |
| C          | -2.730               | 1.836  | -0.687 | -2.7921   | 1.8641  | -0.6821 | 0.0684     | -2.7893    | 1.8517  | -0.6563 | 0.0686     |
| N          | -2.279               | 2.514  | 0.378  | -2.3529   | 2.4504  | 0.4543  | 0.1238     | -2.1589    | 2.3508  | 0.4231  | 0.2076     |
| C          | -1.394               | 1.901  | 1.347  | -1.4658   | 1.7841  | 1.3999  | 0.1470     | -1.4135    | 1.5097  | 1.3444  | 0.3918     |
| O          | -2.510               | 0.652  | -0.905 | -2.5681   | 0.7022  | -1.0215 | 0.1395     | -2.8628    | 0.6645  | -0.9517 | 0.3560     |
| H          | -2.526               | 3.351  | 0.492  | -2.5628   | 3.4314  | 0.5696  |            | -2.1249    | 3.3559  | 0.5054  |            |
| H          | -4.651               | 2.975  | -2.991 | -4.5656   | 3.0501  | -3.1252 |            | -4.3972    | 3.2941  | -3.0476 |            |
| H          | -4.968               | 1.524  | -2.252 | -4.8640   | 1.4453  | -2.3878 |            | -4.8636    | 1.7316  | -2.3033 |            |
| H          | -3.663               | 1.677  | -3.290 | -3.3354   | 1.7500  | -3.2561 |            | -3.3446    | 1.8529  | -3.2282 |            |
| H          | -1.444               | 0.917  | 1.252  | -1.6597   | 0.7105  | 1.3823  |            | -1.8212    | 0.4982  | 1.3047  |            |
| H          | -1.702               | 2.134  | 2.258  | -1.6685   | 2.1646  | 2.4040  |            | -1.5247    | 1.9005  | 2.3578  |            |
| H          | -0.442               | 2.192  | 1.240  | -0.4104   | 1.9567  | 1.1581  |            | -0.3514    | 1.4703  | 1.0834  |            |
| C          | -1.243               | -2.529 | 2.612  | -1.3327   | -2.5375 | 2.6500  | 0.0977     | -0.7757    | -2.2851 | 2.0807  | 0.7484     |
| O          | -2.047               | -2.004 | 1.477  | -2.0250   | -1.9270 | 1.5506  | 0.1088     | -1.8406    | -1.7970 | 1.2690  | 0.3588     |
| C          | -2.768               | -2.821 | 0.687  | -2.7728   | -2.7878 | 0.7895  | 0.1078     | -2.5145    | -2.7566 | 0.5802  | 0.2825     |
| N          | -3.219               | -2.143 | -0.378 | -3.3002   | -2.1403 | -0.2760 | 0.1304     | -3.4066    | -2.1870 | -0.2612 | 0.2253     |
| C          | -4.104               | -2.755 | -1.347 | -4.1339   | -2.8220 | -1.2493 | 0.1222     | -4.1952    | -2.9869 | -1.1732 | 0.3038     |
| O          | -2.988               | -4.005 | 0.905  | -2.9227   | -3.9706 | 1.0645  | 0.1758     | -2.3235    | -3.9472 | 0.7377  | 0.6877     |
| H          | -2.972               | -1.306 | -0.491 | -3.0647   | -1.1631 | -0.4143 |            | -3.3607    | -1.1813 | -0.3806 |            |
| H          | -0.847               | -1.682 | 2.991  | -0.8380   | -1.7175 | 3.1730  |            | -0.3236    | -1.4012 | 2.5320  |            |
| H          | -0.530               | -3.133 | 2.252  | -0.5915   | -3.2559 | 2.2878  |            | -0.0413    | -2.8121 | 1.4675  |            |
| H          | -1.835               | -2.980 | 3.290  | -2.0333   | -3.0497 | 3.3147  |            | -1.1583    | -2.9575 | 2.8511  |            |
| H          | -4.054               | -3.740 | -1.252 | -3.9822   | -3.8975 | -1.1466 |            | -4.0975    | -4.0314 | -0.8765 |            |
| H          | -3.796               | -2.523 | -2.258 | -3.8520   | -2.5146 | -2.2610 |            | -3.8439    | -2.8802 | -2.2044 |            |
| H          | -5.055               | -2.464 | -1.240 | -5.1994   | -2.6062 | -1.0980 |            | -5.2485    | -2.6991 | -1.1212 |            |
| C          | 0.427                | -0.821 | -0.848 | 0.4629    | -0.6920 | -1.2151 | 0.3908     | -0.0150    | -0.8352 | -0.9767 | 0.4606     |
| C          | 1.500                | -1.322 | -0.957 | 1.5818    | -1.1680 | -1.2435 | 0.3354     | 1.1215     | -1.2537 | -0.9641 | 0.3847     |
| C          | 2.757                | -1.885 | -1.078 | 2.8398    | -1.7089 | -1.2745 | 0.2765     | 2.4167     | -1.7325 | -0.9558 | 0.3924     |
| C          | 3.860                | -2.328 | -1.189 | 3.9560    | -2.1942 | -1.3014 | 0.1994     | 3.5521     | -2.1557 | -0.9562 | 0.4227     |
| C          | 5.259                | -2.755 | -1.347 | 5.2943    | -2.7728 | -1.3393 | 0.0402     | 4.9185     | -2.6695 | -0.9711 | 0.5144     |
| H          | -0.432               | -0.421 | -0.761 | -0.5278   | -0.2856 | -1.1812 |            | -1.0250    | -0.4703 | -0.9869 |            |
| H          | 5.308                | -3.740 | -1.252 | 5.2636    | -3.8534 | -1.1557 |            | 4.9518     | -3.6866 | -0.5716 |            |
| H          | 5.566                | -2.523 | -2.258 | 5.7634    | -2.6090 | -2.3170 |            | 5.3087     | -2.6888 | -1.9923 |            |
| H          | 5.868                | -2.333 | -0.679 | 5.9396    | -2.3211 | -0.5763 |            | 5.5750     | -2.0403 | -0.3642 |            |
| RMSD (Å) → |                      |        |        |           |         |         | 0.1643     | RMSD (Å) → |         |         | 0.3870     |

# Variations of geometry during calculations of system **8-8-10**

## Cartesian coordinates and RMSD values (heavy atoms)

| atom       | input (from crystal) |        |        | DFT/B3LYP |         |         |            | DFT/M06-2X |         |         |            |
|------------|----------------------|--------|--------|-----------|---------|---------|------------|------------|---------|---------|------------|
|            | x                    | y      | z      | x         | y       | z       | distance Å | x          | y       | z       | distance Å |
| <b>C</b>   | -4.856               | 2.217  | -2.767 | -4.3213   | 2.0861  | -2.8917 | 0.5645     | -4.1700    | 2.1322  | -2.8505 | 0.6963     |
| <b>O</b>   | -3.982               | 2.665  | -1.656 | -3.8948   | 2.6294  | -1.6286 | 0.0981     | -3.5569    | 2.6567  | -1.6709 | 0.4254     |
| <b>C</b>   | -3.326               | 1.790  | -0.878 | -3.2671   | 1.7641  | -0.7939 | 0.1059     | -3.2514    | 1.7437  | -0.7300 | 0.1721     |
| <b>N</b>   | -2.835               | 2.424  | 0.197  | -2.9429   | 2.3684  | 0.3716  | 0.2126     | -2.6585    | 2.3204  | 0.3325  | 0.2454     |
| <b>C</b>   | -2.070               | 1.744  | 1.224  | -2.1915   | 1.7080  | 1.4318  | 0.2434     | -2.2086    | 1.5727  | 1.4925  | 0.3474     |
| <b>O</b>   | -3.183               | 0.600  | -1.104 | -3.0416   | 0.5881  | -1.0811 | 0.1437     | -3.4934    | 0.5489  | -0.8547 | 0.4013     |
| H          | -2.984               | 3.287  | 0.282  | -3.1354   | 3.3576  | 0.4370  |            | -2.4870    | 3.3130  | 0.2691  |            |
| H          | -5.214               | 3.080  | -3.109 | -4.7464   | 2.9299  | -3.4350 |            | -4.3635    | 2.9961  | -3.4837 |            |
| H          | -5.577               | 1.631  | -2.402 | -5.0775   | 1.3111  | -2.7395 |            | -5.1016    | 1.6213  | -2.6004 |            |
| H          | -4.311               | 1.769  | -3.470 | -3.4730   | 1.6652  | -3.4367 |            | -3.4961    | 1.4330  | -3.3498 |            |
| H          | -2.130               | 0.766  | 1.081  | -2.3663   | 0.6325  | 1.3844  |            | -2.5843    | 0.5513  | 1.4172  |            |
| H          | -2.461               | 1.949  | 2.110  | -2.5375   | 2.0802  | 2.3995  |            | -2.5959    | 2.0303  | 2.4061  |            |
| H          | -1.103               | 2.021  | 1.215  | -1.1147   | 1.8926  | 1.3403  |            | -1.1155    | 1.5373  | 1.5363  |            |
| <b>C</b>   | -1.378               | -2.388 | 2.768  | -1.7698   | -2.4063 | 2.8818  | 0.4083     | -1.3904    | -2.0872 | 2.5918  | 0.3488     |
| <b>O</b>   | -2.253               | -1.940 | 1.656  | -2.4212   | -1.8741 | 1.7188  | 0.1913     | -2.4675    | -1.7403 | 1.7266  | 0.3015     |
| <b>C</b>   | -2.908               | -2.815 | 0.879  | -3.1756   | -2.7779 | 1.0138  | 0.3019     | -2.8201    | -2.7163 | 0.8470  | 0.1360     |
| <b>N</b>   | -3.399               | -2.182 | -0.197 | -3.6783   | -2.2026 | -0.1043 | 0.2950     | -3.7598    | -2.2664 | -0.0162 | 0.4122     |
| <b>C</b>   | -4.164               | -2.861 | -1.223 | -4.5093   | -2.9388 | -1.0397 | 0.3986     | -4.1166    | -3.0941 | -1.1523 | 0.2482     |
| <b>O</b>   | -3.051               | -4.005 | 1.104  | -3.3493   | -3.9331 | 1.3787  | 0.4118     | -2.3480    | -3.8360 | 0.8679  | 0.7606     |
| H          | -3.251               | -1.319 | -0.282 | -3.4255   | -1.2414 | -0.3143 |            | -3.8572    | -1.2603 | -0.1001 |            |
| H          | -1.021               | -1.526 | 3.109  | -1.2810   | -1.5539 | 3.3569  |            | -1.2164    | -1.2076 | 3.2129  |            |
| H          | -0.657               | -2.974 | 2.403  | -1.0266   | -3.1565 | 2.5972  |            | -0.4956    | -2.3266 | 2.0102  |            |
| H          | -1.923               | -2.837 | 3.471  | -2.4950   | -2.8609 | 3.5606  |            | -1.6560    | -2.9464 | 3.2111  |            |
| H          | -4.104               | -3.839 | -1.081 | -4.5062   | -3.9913 | -0.7514 |            | -4.4038    | -4.0873 | -0.8040 |            |
| H          | -3.774               | -2.657 | -2.110 | -4.1130   | -2.8456 | -2.0565 |            | -3.2840    | -3.2037 | -1.8568 |            |
| H          | -5.122               | -2.586 | -1.214 | -5.5447   | -2.5754 | -1.0297 |            | -4.9635    | -2.6354 | -1.6635 |            |
| <b>C</b>   | 1.339                | -1.183 | -1.106 | 1.5683    | -0.9842 | -1.4988 | 0.4964     | 0.9096     | -1.1780 | -1.1275 | 0.4300     |
| <b>C</b>   | 2.458                | -1.604 | -1.138 | 2.7189    | -1.3855 | -1.4986 | 0.4958     | 2.0692     | -1.5248 | -1.1834 | 0.3993     |
| <b>C</b>   | 3.745                | -2.078 | -1.180 | 4.0083    | -1.8390 | -1.4903 | 0.4719     | 3.3877     | -1.9195 | -1.2462 | 0.3965     |
| <b>C</b>   | 4.862                | -2.454 | -1.210 | 5.1554    | -2.2487 | -1.4754 | 0.4457     | 4.5469     | -2.2680 | -1.3018 | 0.3773     |
| <b>C</b>   | 6.281                | -2.861 | -1.223 | 6.5249    | -2.7460 | -1.4531 | 0.3545     | 5.9418     | -2.6918 | -1.3702 | 0.4066     |
| <b>Br</b>  | -0.346               | -0.547 | -1.082 | -0.1375   | -0.4172 | -1.4613 | 0.4519     | -0.8045    | -0.6635 | -1.0413 | 0.4748     |
| H          | 6.341                | -3.839 | -1.081 | 6.5442    | -3.8351 | -1.3332 |            | 6.0235     | -3.7693 | -1.2051 |            |
| H          | 6.671                | -2.657 | -2.110 | 7.0493    | -2.5002 | -2.3835 |            | 6.3659     | -2.4606 | -2.3508 |            |
| H          | 6.802                | -2.398 | -0.523 | 7.0896    | -2.3065 | -0.6230 |            | 6.5372     | -2.1809 | -0.6089 |            |
| RMSD (Å) → |                      |        |        |           |         |         | 0.3393     | RMSD (Å) → |         |         | 0.3661     |
